# Supplementary material
Source: HighWire-hosted journal article supplement (https://bmjopensem.bmj.com/content/3/1/e000281)
Supplement: inline-supplementary-material-1 [file inline-supplementary-material-1.pdf]

## **Appendix – Search strategy**

### First step

Rugby-specific skill\* ORgame specific skill\* ORrugby skill\* ORtechnical skill\*

ANDadult ORsenior ORadolescent\* ORyouth ORteenager\* ORelite ORsub-elite ORmale ORU-16  
players ORU-18 players ORprofessional ORamateur

ANDrugby ORrugby union ORrugby union team ORrugby league ORrugby player\* ORelite rugby  
players

ANDtest\* ORscreening\* ORmeasure\*

### Second step

Rugby-specific skill\* ORgame specific skill\* ORrugby skill\* ORtechnical skill\*

ANDadult ORsenior ORadolescent\* ORyouth ORteenager\* ORelite ORsub-elite ORmale ORU-16  
players ORU-18 players ORprofessional ORamateur

ANDrugby ORrugby union ORrugby union team ORrugby league ORrugby player\* ORelite rugby  
players

ANDtest\* ORscreening\* ORmeasure\*

AND psychometrics [MeSH] OR psychometr\* OR psychometric property\* OR clinimetr\* OR  
clinometr\* ORclinimetric property\* ORmeasurement property ORreproducibility of results [MeSH]  
ORreproducib\* ORreliab\* ORtest-retest ORintra-rater ORinter-rater ORco-efficient ORinternal  
consistency ORalpha cronbach\* ORmeasurement error ORvalid\* ORconstruct valid\* ORcontent  
valid\* ORface valid\* ORvalidation ORdiscriminative
